# Supplementary material for: Optical band gaps and spectroscopy properties of Bim+/Eun+/Yb3+ co-doped (m = 0, 2, 3; and n = 2, 3) zinc calcium silicate glasses
Source: Royal Society of Chemistry journal article supplement (doi:10.1039/d2ra07310b), 2023-01-01
Supplement: d2ra07310b1.pdf [file d2ra07310b1.pdf]

### Electronic Supplementary Information

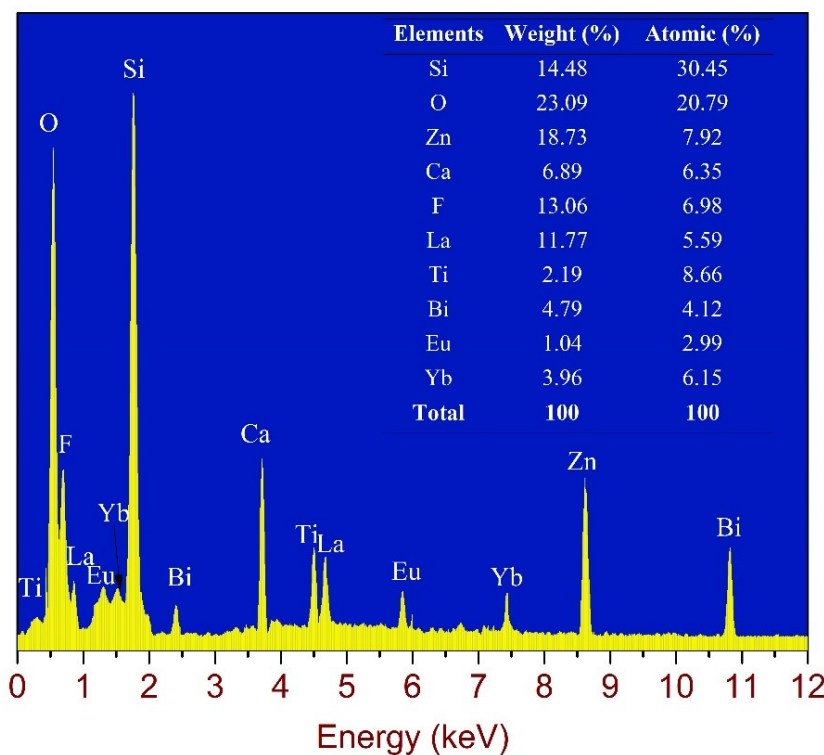

Fig. S1 EDS spectrum of SZC-1.0Bi0.6Eu2Yb zinc calcium silicate glass sample.

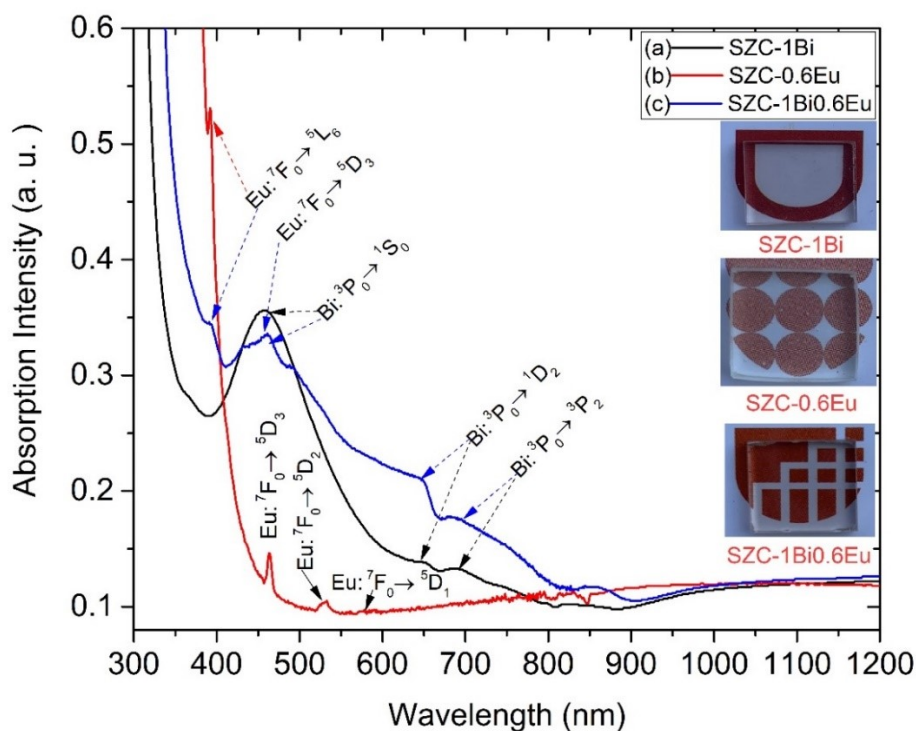

Fig. S2 Absorption spectra of SZC-1.0Bi, SZC-0.6Eu, and SZC-1.0Bi0.6Eu zinc calcium silicate glass samples.

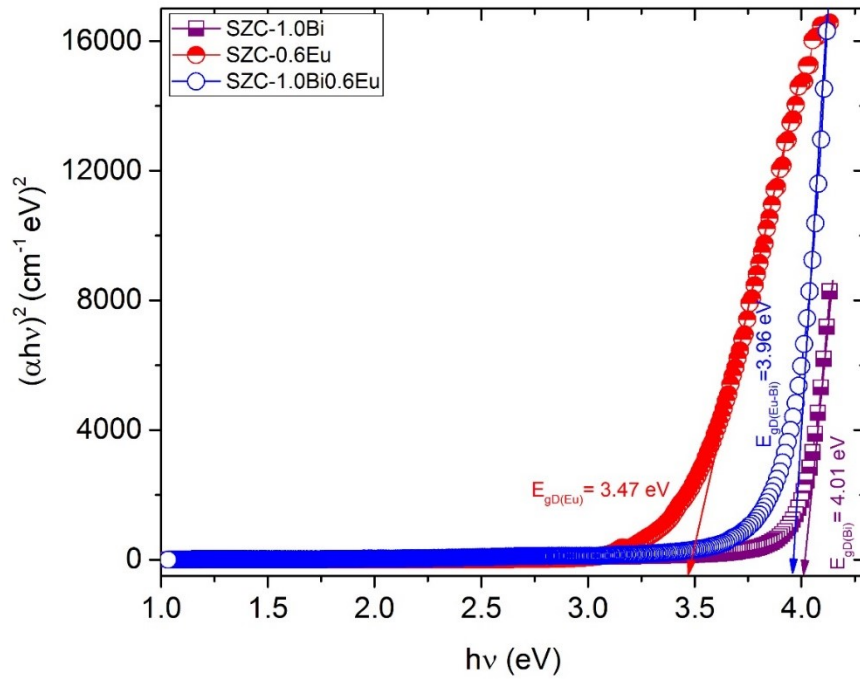

Fig. S3 (a) Direct optical band gaps of SZC-1.0Bi, SZC-0.6Eu, and SZC-1.0Bi0.6Eu zinc calcium silicate glass samples.

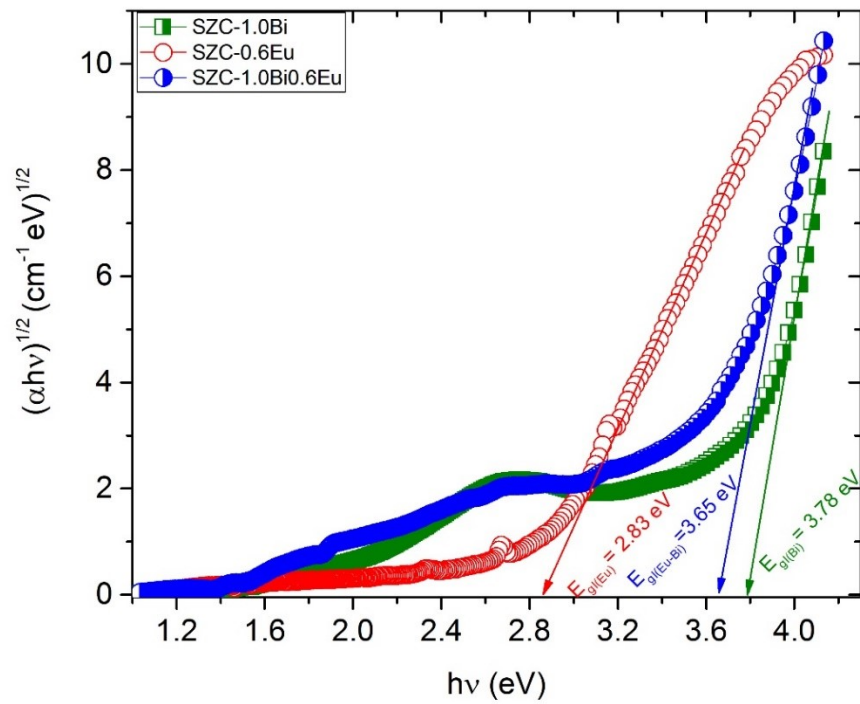

Fig. S3 (b) Indirect optical band gaps of SZC-1.0Bi, SZC-0.6Eu, and SZC-1.0Bi0.6Eu zinc calcium silicate glass samples.

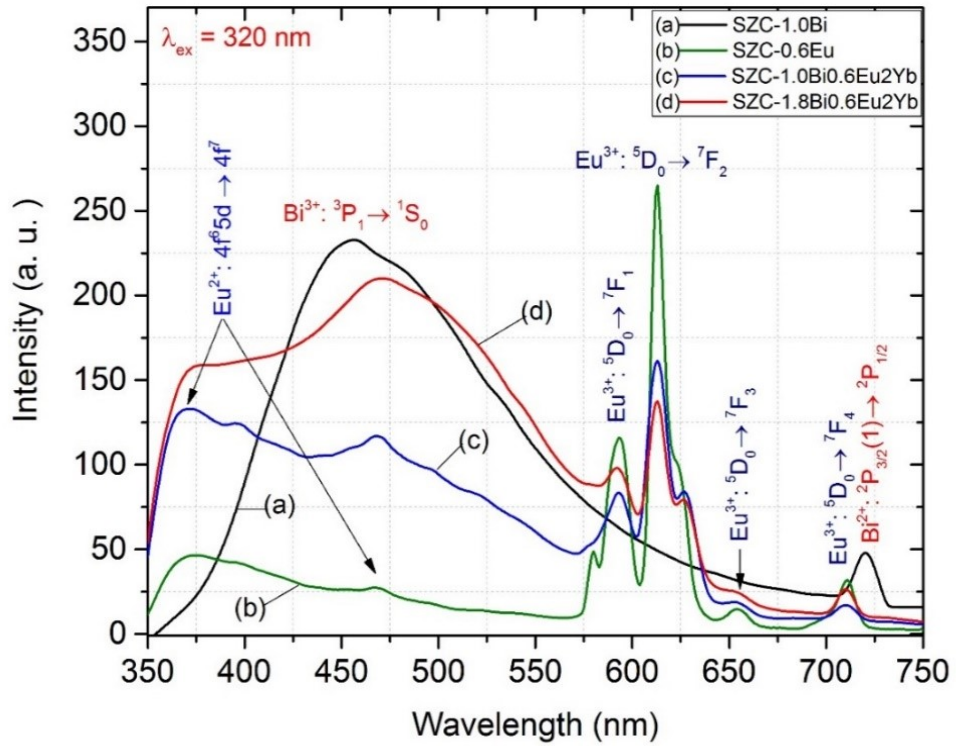

Fig. S4 VIS emission spectra of SZC-1.0Bi, SZC-0.6Eu, SACL-1.0Bi0.6Eu2Yb and SACL-1.8Bi0.6Eu2Yb zinc calcium silicate glass samples under 320 nm excitation.

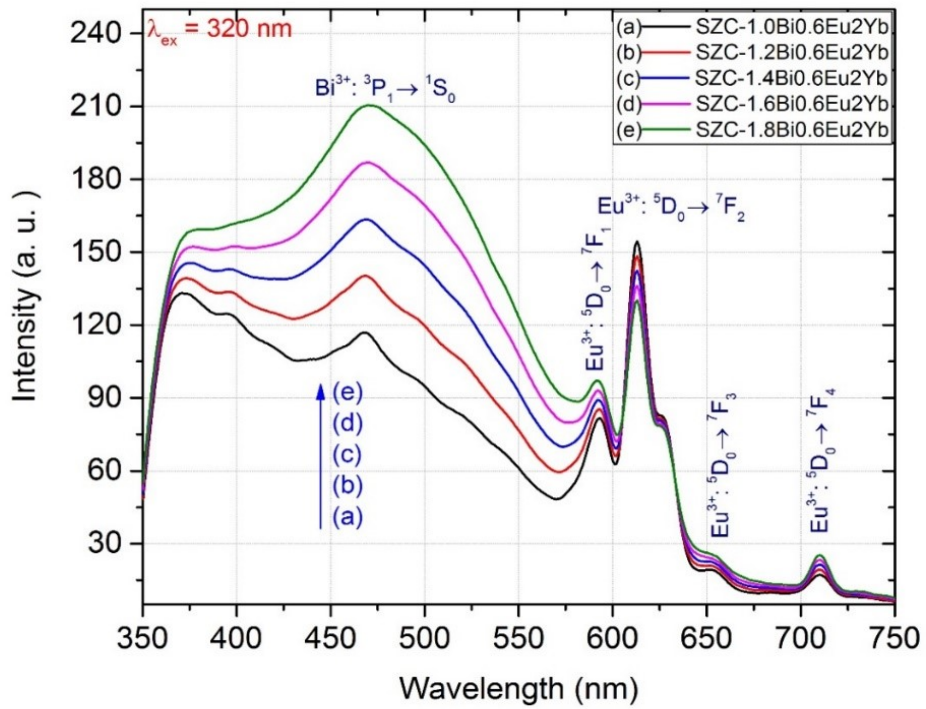

Fig. S5 VIS emission spectra of SZC-xBi0.6Eu2Yb (x = 1.0, 1.2, 1.4, 1.6, and 1.8 mol. %) zinc calcium silicate glass samples under 320 nm excitation.

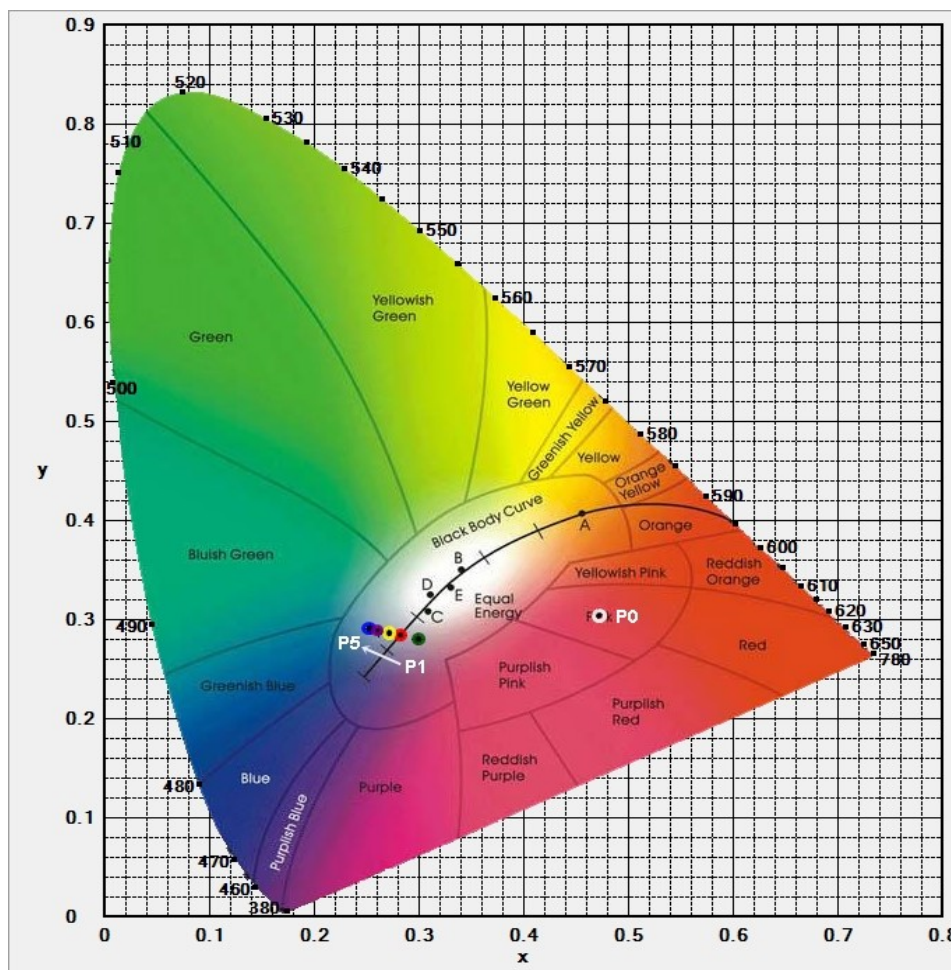

Fig. S6 CIE 1931 (x, y) color coordinates for VIS emission of SZC-0.6Eu and SZC-xBi0.6Eu2Yb (x = 1.0, 1.2, 1.4, 1.6, and 1.8 mol. %) zinc calcium silicate glass samples under 320 nm excitation.

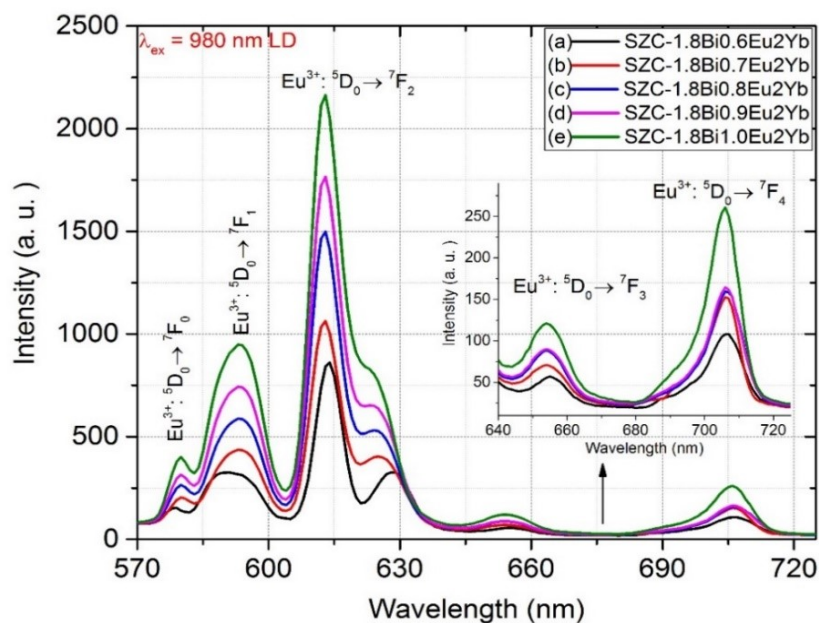

Fig. S7 UC emission spectra of SZC-1.8Bi<sub>y</sub>Eu<sub>2</sub>Yb (y = 0.6, 0.7, 0.8, 0.9, and 1.0 mol. %) zinc calcium silicate glass samples.



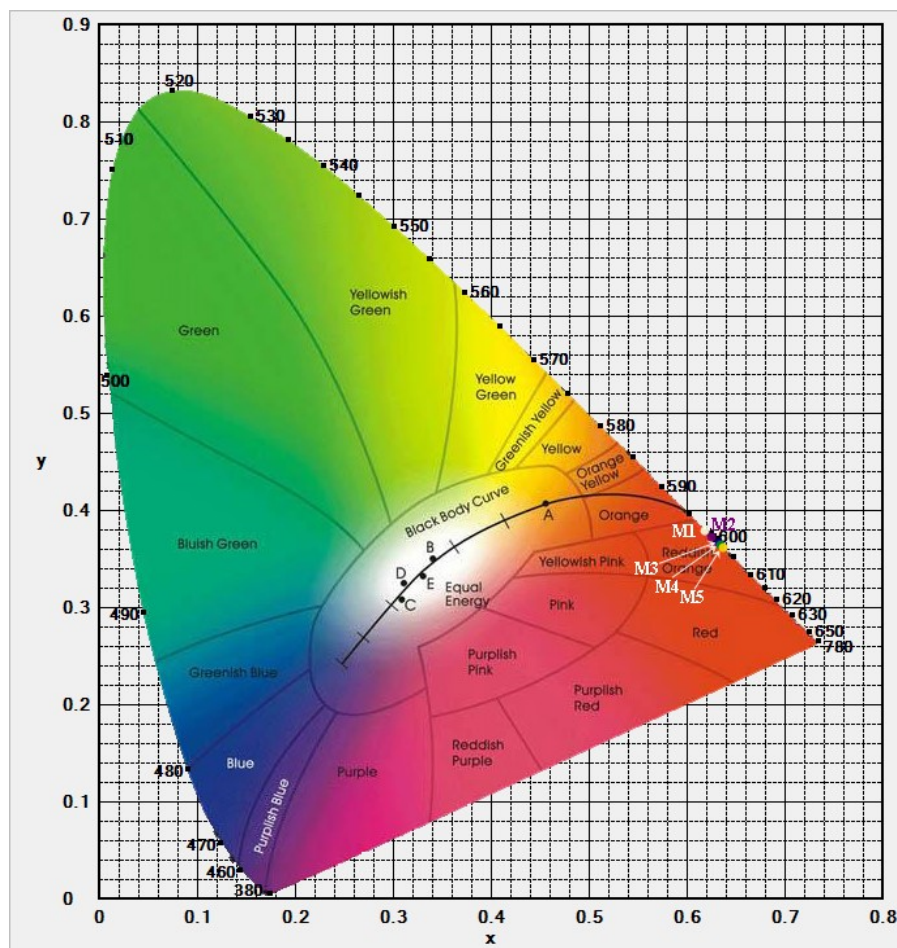

Fig. S8 CIE 1931 (x, y) for UC emission spectra of SZC-1.8BiEu<sub>2</sub>Yb (y = 0.6, 0.7, 0.8, 0.9, and 1.0 mol. %) zinc calcium silicate glass samples under 980 nm LD excitation.

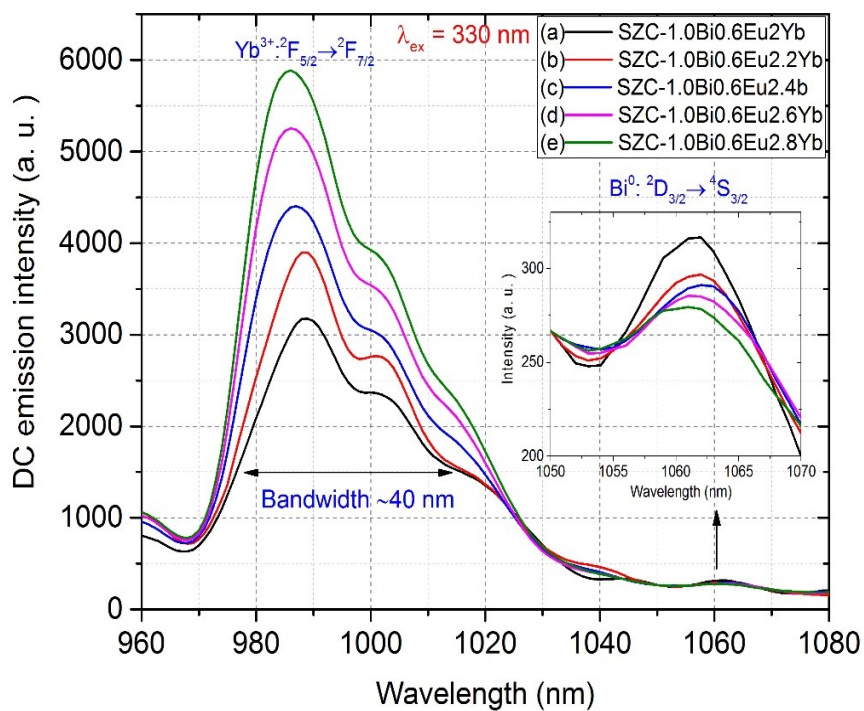

Fig. S9 NIR emission spectra of SZC-1Bi<sub>0.6</sub>Eu<sub>z</sub>Yb (z = 2.0, 2.2, 2.4, 2.6, and 2.8 mol. %) zinc calcium silicate glass samples.

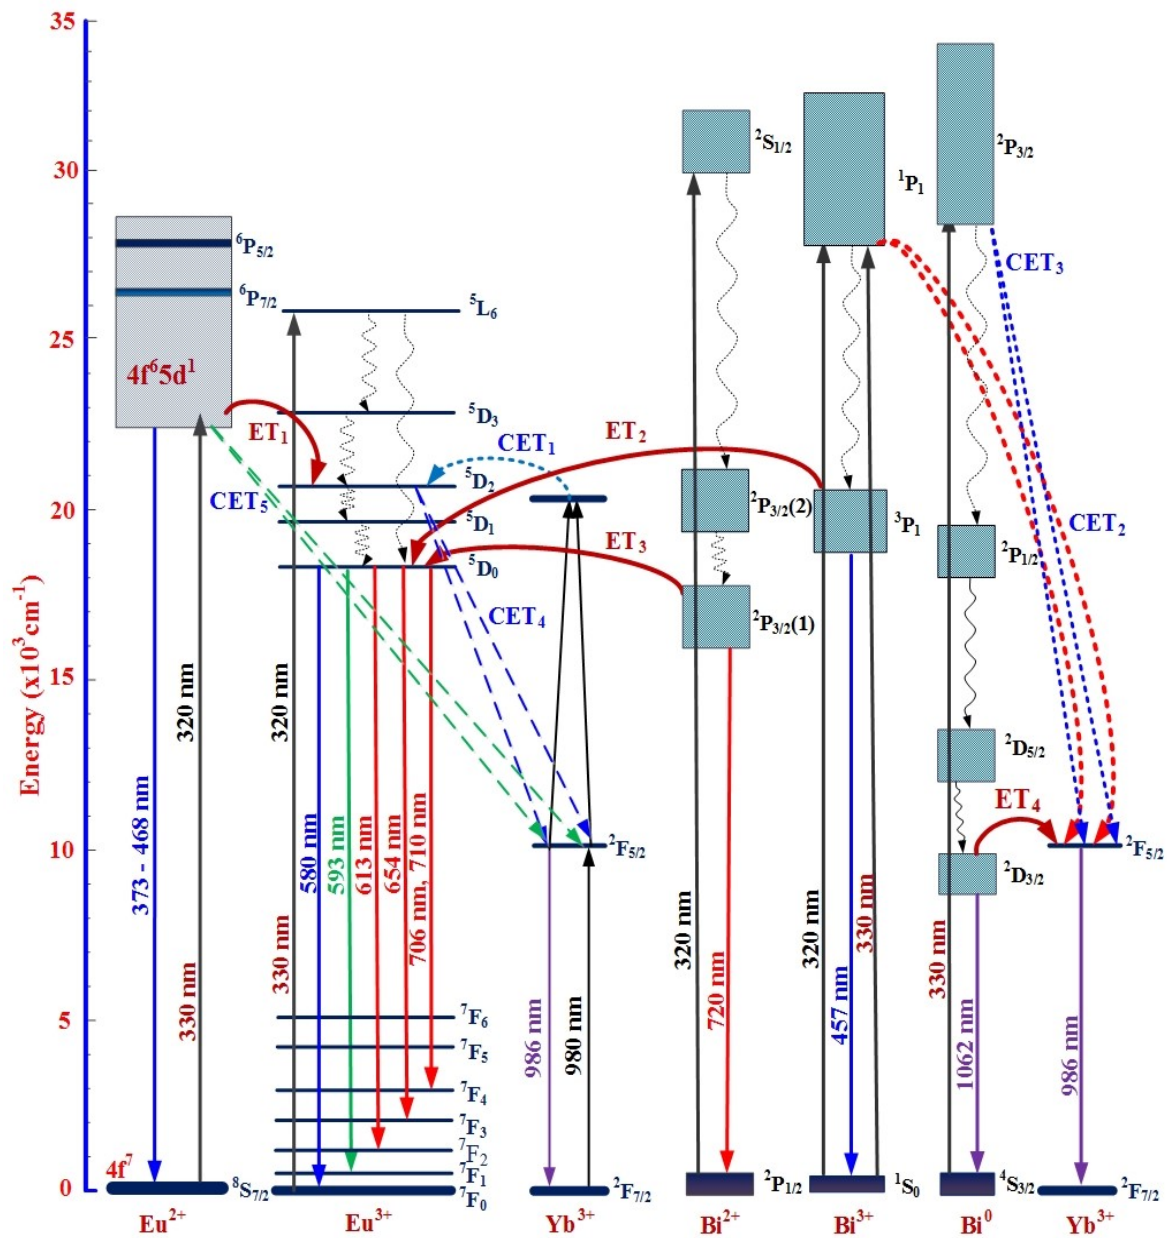

Fig. S10 Energy levels, VIS-, UC-, NIR- emissions and mechanism of CET<sub>I</sub>(I from 1 to 5), and ET<sub>J</sub>(J from 1 to 4) processes between Bi<sup>m+</sup>, Eu<sup>n+</sup>, and Yb<sup>3+</sup> in SZC zinc calcium silicate glasses.
